# Supplementary material for: Comparison of Hi-C results using in-solution versus in-nucleus ligation
Source: PubMed Central journal article supplement (PMC4580221; doi:10.1186/s13059-015-0753-7), 2015-08-26

## Additional File 2. Assessing randomness of hybrid di-tags.

We calculated if there is non-randomness between A and B compartment interactions among the hybrid di-tags, by performing a Fisher test on the di-tag counts, using a 1Mb bin resolution for the compartments.

| sample            | unique di-tags | $A_m-A_h$ | $A_m-B_h$ | $B_m-A_h$ | $B_m-B_h$ | $P_{\text{Fisher}}$ |
|-------------------|----------------|-----------|-----------|-----------|-----------|---------------------|
| mouse-human-1 ISL | 17,137,291     | 408,084   | 549,043   | 393,004   | 525,479   | 0.035               |
| mouse-human-2 ISL | 488,340        | 2,851     | 3,976     | 2,572     | 3,618     | 0.82                |
| mouse-human-1 INL | 11,533,994     | 1,610     | 2,158     | 1,641     | 2,260     | 0.56                |
| mouse-human-2 INL | 573,366        | 82        | 82        | 77        | 78        | 1.00                |

The mouse-human-1 INL, mouse-human-2 INL and mouse-human-2 ISL show no statistically significant bias for compartmental interactions. Although the mouse-human-1 ISL dataset shows statistically significant non-random A-B compartment interactions, this is only a statistical significance due to the large number of counts, and does not imply biological significance (the odds ratio is 0.994, with a 95% confidence interval of (0.988, 0.9996)). Error bars show 95% confidence interval.

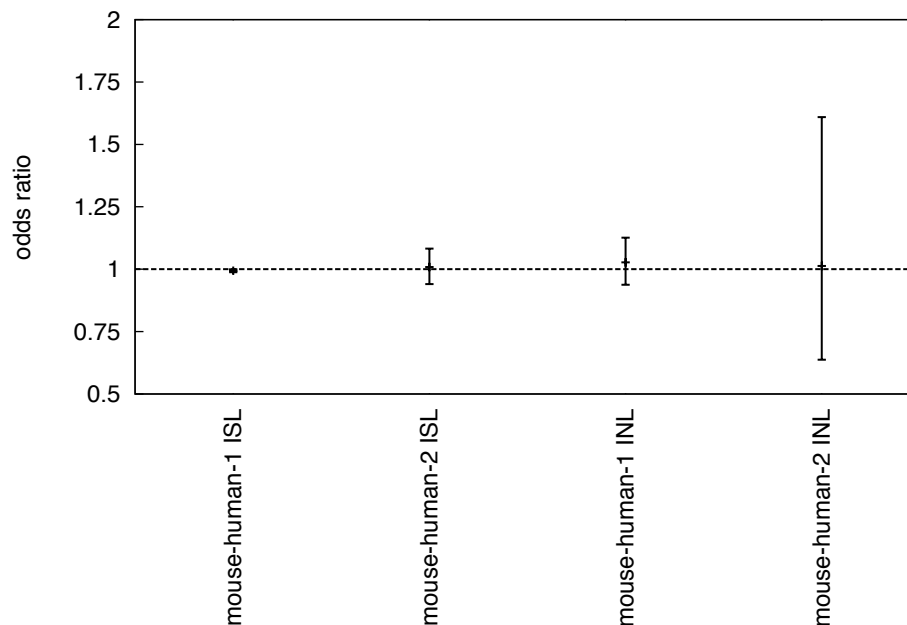

Supplement: 13059_2015_753_MOESM2_ESM.pdf [file 13059_2015_753_MOESM2_ESM.pdf]
