# Supplementary material for: Comparison of Hi-C results using in-solution versus in-nucleus ligation
Source: PubMed Central journal article supplement (PMC4580221; doi:10.1186/s13059-015-0753-7), 2015-08-26
Supplement: 13059_2015_753_MOESM3_ESM.pdf [file 13059_2015_753_MOESM3_ESM.pdf]

### Additional File 3. In-nucleus versus in-solution ligations.

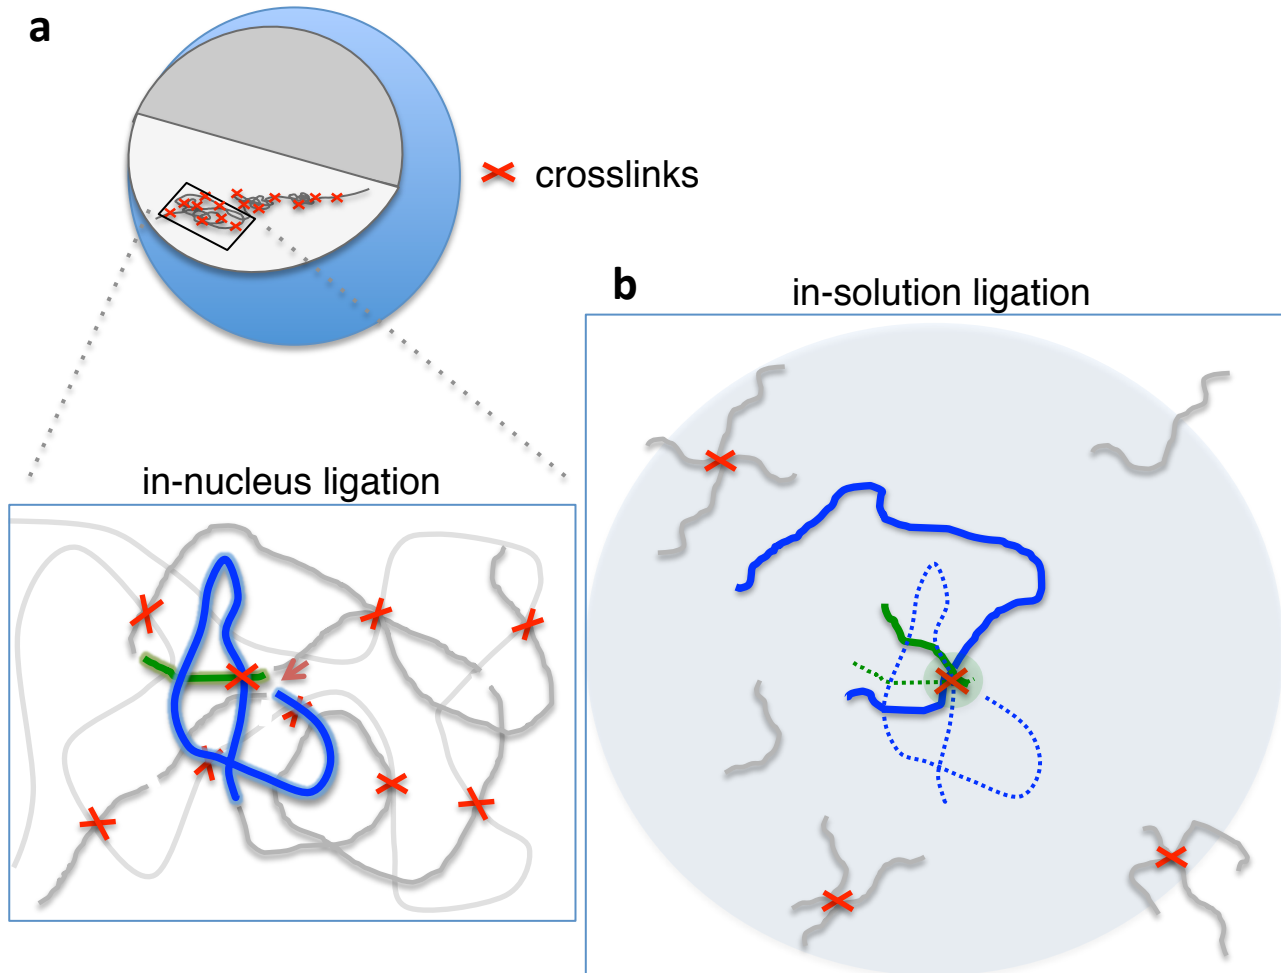

**In-nucleus versus in-solution ligations.** **a)** During in-nucleus ligation, chromatin fragments are fixed in position and ligate to other fragment ends in close nuclear proximity. **b)** With in-solution ligation nuclear structure is lost and fragment end mobility is increased. Solid green and blue lines represent possible conformations of the original cross-linked complex (dashed lines). Light blue and green circles depict the potential volumes explored by the blue and green fragment ends shown by the orange arrow in **a**). This difference in mobility may explain fragment length bias observed with in-solution ligation. In-solution ligation takes place in greater than one million fold excess of complexes and fragments from other chromosomes and/or other cells (grey lines) leading to increased spurious ligation products manifest as increased trans di-tags and experimental noise.
